1 **Competitive ecosystems are robustly stabilized by structured environments**

2 Tristan Ursell<sup>1,2,3\*</sup>

3 <sup>1</sup>Institute of Molecular Biology, <sup>2</sup>Materials Science Institute and <sup>3</sup>Department of Physics, University of  
4 Oregon, Eugene, OR 97403

5 **ABSTRACT**

6 Natural environments, like soils or the mammalian gut, frequently contain microbial consortia competing  
7 within a niche, wherein many species contain genetic mechanisms of interspecies competition. Recent  
8 computational work suggests that physical structures in the environment can stabilize competition  
9 between species that would otherwise be subject to competitive exclusion under isotropic conditions.  
10 Here we employ Lotka-Volterra models to show that physical structure stabilizes large competitive  
11 ecological networks, even with significant differences in the strength of competitive interactions between  
12 species. We show that for stable communities the length-scale of physical structure inversely correlates  
13 with the width of the distribution of competitive fitness, such that physical environments with finer  
14 structure can sustain a broader spectrum of interspecific competition. These results highlight the generic  
15 stabilizing effects of physical structure on microbial communities and lay groundwork for engineering  
16 structures that stabilize and/or select for diverse communities of ecological, medical, or industrial utility.

17

18 **AUTHOR SUMMARY**

19 Natural environments often have many species competing for the same resources and frequently one  
20 species will out-compete others. This poses the fundamental question of how a diverse array of species  
21 can coexist in a resource limited environment. Among other mechanisms, previous studies examined how  
22 interactions between species – like cooperation or predation – could lead to stable biodiversity. In this  
23 work we looked at this question from a different angle: we used computational models to examine the  
24 role that the environment itself might play in stabilizing competing species. We modeled how species  
25 arrange themselves in space when the environment contains objects that alter the interfaces along which  
26 competing species meet. We found that these ‘structured’ environments stabilize species coexistence,  
27 across a range of density of those objects and in a way that was robust to differing strengths of  
28 interspecies competition. Thus, in addition to biological factors, our work presents a generic mechanism  
29 by which the environment itself can influence ecological outcomes and biodiversity.

## 30 INTRODUCTION

31 Natural environments from scales of microbes<sup>1-4</sup> to large ecosystems<sup>5-8</sup> are replete with communities  
32 whose constituent species stably coexist at similar trophic levels, despite apparent competition for space  
33 and resources. Generically, in spatially limited ecosystems species grow until resources and/or  
34 interactions with other species (e.g. competition or predation) limit their populations, notably not  
35 necessarily at a constant level through time<sup>9-11</sup>. In some cases<sup>12</sup>, the same set of species may exhibit  
36 qualitatively distinct relationships in a way that depends on available resources, with corresponding  
37 maintenance or loss of diversity. Species diversity and ecosystem stability have a complicated  
38 relationship<sup>13,14</sup>, and qualitatively different theories have been developed to explain variations in species  
39 diversity and abundance in resource-limited natural environments<sup>15,16</sup>. At one extreme, the principle of  
40 competitive exclusion asserts that if more than one species is competing within a niche, variations in  
41 species reproduction rates resulting from adaptation to the niche will necessarily lead one species to  
42 dominate within that niche to the exclusion of all other species, potentially driving inferior competitors  
43 into other niches<sup>17-21</sup>. Thus, competition for resources within a niche would push ecosystems toward  
44 lower species diversity<sup>22</sup>. At the other extreme are so-called ‘neutral theories’ which offer the null-  
45 hypothesis that organisms coexisting at similar trophic levels are – *per capita* – reproducing, consuming,  
46 and migrating at similar rates, and hence maintenance of biodiversity is tantamount to a high-dimensional  
47 random-walk through abundance space<sup>23-25</sup>. Such models often require connections to an external meta-  
48 community to maintain long-term stability<sup>26</sup>, lest random fluctuations will eventually drive finite systems  
49 toward lower diversity<sup>27,28</sup>. Many other mechanisms (which we cannot do justice to here) have also been  
50 proposed for maintenance of diversity in competitive ecosystems, including by not limited to: stochasticity  
51 and priority effects<sup>29,30</sup>; environmental variability<sup>31</sup>; models that encode specific relationships between  
52 species to maintain diversity<sup>32</sup> (including the classic rock-paper-scissors spatial game<sup>11</sup>, cross-feeding<sup>33-37</sup>,  
53 metabolic trade-offs<sup>38-40</sup>, or cross-protection<sup>41</sup>); varied interaction models<sup>42</sup>; higher-order interactions –  
54 beyond pairwise – that stabilize diversity<sup>43-46</sup>; and systems where evolution and ecological competition  
55 happen simultaneously<sup>47,48</sup>. We do not take issue with any of these models / mechanisms, indeed, all of  
56 them are likely relevant and useful within certain contexts. Rather, this work uses computational modeling  
57 to argue that physical structure within an environment is a generic and robust mechanism for maintaining  
58 biodiversity in competitive ecosystems, across differences in competitive parameters, length-scales of  
59 physical structure, and for an arbitrary number of distinct species given lower-bound requirements on  
60 available space.

61 Microbial ecosystems present a particularly attractive test-bed for these ecological ideas. From a practical  
62 point of view, they are small and fast growing, relatively easy to genetically manipulate, and can be grown  
63 in controlled and customizable synthetic environments<sup>35,49–52</sup>, such as microfluidics<sup>53,54</sup>. Conceptually,  
64 characterizing the forces and principles that establish and maintain microbial biodiversity is of significant  
65 interest in health-relevant settings like the human gut<sup>55–57</sup> and in the myriad contexts where soil  
66 microbiota impact natural or agricultural ecosystems<sup>1,58</sup>. These contexts motivate the model herein  
67 discussed, which can be conceptualized as a multi-species microbial ecosystem adherent to reasonable  
68 simplifications that make computations tractable. We used a spatial Lotka-Volterra model and assumed  
69 that all pairwise interspecies interactions were competitive. We focused on the role that physical  
70 structure of the environment plays in long-term dynamics of such ecosystems. Within the context of this  
71 model, our results were clear – steric structures distributed throughout the environment foster  
72 biodiversity in a way that depends less on the specific arrangement of those structures and more on the  
73 length scale of separation between the structures<sup>59</sup>. This structural stabilization was robust even when  
74 the ecosystem contained significant asymmetries in the competitive interactions between species, and  
75 the degree of stabilization positively correlated with decreasing structural scale. Finally, we provide  
76 evidence that the stabilizing effects of steric structure extend to an arbitrary number of species in  
77 competition with each other, as long as there is enough space.

78

## 79 **Results**

### 80 **Competition and Structural Model**

81 We modeled interspecies interactions using the canonical spatial Lotka-Volterra (LV) framework, with  
82 simplifying assumptions motivated by attributes of microbial ecosystems. For all species, we assumed that  
83 the carrying capacity per unit area of the environment is the same, that the basal growth rate  $r$  is the  
84 same, and that their migration can be described by random walks with the same diffusion coefficient  $D$ .  
85 Using those assumptions, the system of partial differential equations (PDEs) that describe an  $N$ -species LV  
86 model can be non-dimensionalized and, without loss of generality, written as

$$87 \quad \frac{\partial S_i}{\partial t} = \nabla^2 S_i + S_i \left( 1 - \sum_{k=1}^N S_k (1 + (1 - \delta_{ik})/P_{ik}) \right).$$

88 Each focal species  $S_i$  has a local concentration from zero to one in units of the carrying capacity, time is  
89 measured in units of inverse growth rate  $r^{-1}$  and the natural length scale  $\lambda = \sqrt{D/r}$  is proportional to the

90 root mean squared distance an organism will move over a single doubling time. Self-interactions and  
91 simple competition for space are accounted for by the constrained carrying capacity and the  
92 corresponding sum over  $S_k$ , and thus the diagonal elements  $P_{ii}$  are removed by the Kronecker delta,  $\delta_{ik}$ .  
93 Pairwise interactions between species are described by the off-diagonal matrix elements  $P_{ik}$  which are  
94 the concentrations of species  $S_k$  above which  $S_k$  actively reduces the concentration of  $S_i$ . Neglecting  
95 intrinsic permutation symmetries, there are  $N(N - 1)$  pairwise interaction parameters for each *in silico*  
96 ecosystem, which can be thought of as a directed graph whose edges connect each pair of species. We  
97 focused on the class of ecological graphs that correspond to all species in competition with all other  
98 species, termed ‘all-to-all’ (ATA) competition, which corresponds to all off-diagonal elements  $P_{ik} > 0$ . This  
99 work uses computationally tractable values of  $N$  to support general claims about the dynamics of ATA  
100 ecosystems in structured environments, albeit such computations do not constitute a rigorous proof.

101 This model is appropriate for describing diffusively-mediated locally competitive interactions; examples  
102 of such ecosystems include situations where multiple species compete for the same pool of resources and  
103 actively reduce competitor abundances through (e.g.) Type VI secretion system mediated killing<sup>60,61</sup>,  
104 secretion of toxins<sup>62,63</sup> or antibiotic antagonism<sup>64,65</sup>. Analysis of bacterial genomes indicates that (at least)  
105 a quarter of all sequenced species contain loci encoding for mechanisms of active competition toward  
106 other species<sup>66</sup> (though not necessarily for the purposes of consuming them as prey). Additional PDEs  
107 would be required to describe highly motile cells, chemotaxis in exogenous chemical gradients, or the  
108 production, potency, transport and decay of rapidly diffusing secreted toxins. This system of PDEs (which  
109 is not new<sup>67,68</sup>) represents a baseline set of assumptions and corresponding phenomena from which to  
110 build more complex models<sup>69</sup> of structured population dynamics.

111 The  $O(N^2)$  dimensional parameter space is too large to exhaustively sample for large  $N$ , and thus we  
112 employed statistical sampling techniques. We sampled a uniform random distribution of values for the  
113 off-diagonal elements  $P_{ik}$  whose mean was  $\langle P \rangle = 0.25$  and whose width was specified by the parameter  
114  $\Delta P$ . The value  $\langle P \rangle = 0.25$  indicates that on average when the local concentration of a given species  
115 reaches one-quarter of the carrying capacity, active reduction of neighboring competitors will occur. For  
116 each value of  $\Delta P$  and structural parameters, we performed 30 to 50 simulations each with a unique  
117 random sampling of the interaction parameters  $P_{ik}$ . All simulations had initial conditions in which every  
118 grid position had a low (0.2%) probability of being populated by any one of the available species, such that  
119 each species could grow and claim territory before competing. The data herein presented uses an 8-  
120 species system (56 interaction parameters), though in the last section we examine larger values of  $N$ .

121 Our *in silico* environments were square 2D planes with steric pillars distributed in the simulation space.  
122 Both the pillars and the bounding box were modeled with reflecting boundary conditions, thus, like a grain  
123 in soil or tissue in a gut, these pillars do not allow free transport through them, nor microbes to occupy  
124 them. Interspecies boundaries within the simulation area are primarily impacted by steric spacing<sup>70</sup>, and  
125 thus for simplicity the radii of the pillars were held fixed at  $R = 3$  in dimensionless units for all simulations.  
126 We varied the mean distance between steric objects relative to pillar radius ( $\Delta x/R$ ), which we refer to as  
127 the ‘structural scale’, and we varied the degree of disorder in the arrangement of those steric objects.  
128 Disorder was introduced by translating each pillar in a random direction by an amount drawn from a  
129 uniform random distribution whose width is reported relative to the structural scale. Thus, disorder is  
130 characterized by a continuous dimensionless variable  $\delta$ , which when equal to zero means the pillars are  
131 arranged in an ordered triangular lattice, and as  $\delta$  increases the pillars approach a random arrangement  
132 in the simulation space (including the possibility of overlap) (see SI Fig. 1).

133 Finally, it is worth noting limitations and simplifications inherent in this modeling framework. These  
134 systems of PDEs are deterministic, that is, with the same interaction parameters, simulation size and initial  
135 conditions they produce the exact same dynamics. Stochasticity enters our simulation framework through  
136 the random initial conditions, disorder, and random samplings of the interaction parameters. A number  
137 of excellent studies have examined low- $N$  systems using fully stochastic dynamics<sup>71–75</sup>, revealing  
138 quantitative differences between deterministic and stochastic models, as well as qualitative differences  
139 over long time scales where stochastic fluctuations can drive a system into new parts of phase space, for  
140 example, into extinction cascades<sup>76,77</sup> or mobility-dependent biodiversity<sup>71,73,78</sup>. Details of our  
141 computational setup are discussed in the Methods section and all of our code is available upon request.

142

### 143 **Environmental structure stabilizes all-to-all competition**

144 We compared the spatial population dynamics of an 8-species system with and without the inclusion of  
145 spatial structure. In both cases, each species engaged in active (population reducing) competition with  
146 every other species, for a total of 56 pairwise interactions each characterized by the value of an off-  
147 diagonal matrix element. In Fig. 1 we show the simplest version of this comparison, where the strength  
148 of the competitive interaction is equal between all pairs of species (i.e. all off-diagonal elements have the  
149 same value,  $\Delta P = 0$ ). When a system lacks steric structure, and hence is spatially isotropic, a single  
150 dominant competitor will emerge to the exclusion of all other species<sup>79</sup> (Fig. 1 A/B). Spatial population

151 dynamics are determined by an interplay between the curvature of the interface between any two species  
152 and the relative values of the competition parameters for the species that meet at that interface<sup>70</sup>. If  
153 competition at a particular two-species interface is balanced (i.e.  $P_{ik} = P_{ki}$ ) then interfacial curvature is the  
154 only determinant of interface movement; straight interfaces do not translate and curved interfaces  
155 translate in the direction that straightens them. However, if the interaction at a two-species interface is  
156 unbalanced (i.e.  $P_{ik} \neq P_{ki}$ ) then there is a critical interface curvature below which the stronger competitor  
157 will invade the space of a weaker competitor, ultimately to the exclusion of the weaker competitor.  
158 Excepting literal edge cases, wherein boundaries between species contact multiple parallel edges of the  
159 simulation space, the dominance of a single competitor in isotropic space is robust to changes in the size  
160 of the simulation space, the number of species and the values of interaction parameters, given enough  
161 time.

162 In contrast, the inclusion of physical structure leads to long term, stable representation of multiple (and  
163 often all) species across a range of structural scales and interaction parameters. In Fig. 1 C/D we show the  
164 evolution of balanced competitive interactions between 8 species with the same initial conditions and  
165 interaction parameters as Fig. 1 A/B, but in the presence of a triangular lattice of steric pillars. In this  
166 system, the abundances of all 8 species rapidly equilibrated leading to stable coexistence. In this stable  
167 state, each species established spatial domains whose boundaries were primarily composed of two-  
168 species interfaces governed by the same rules of interfacial curvature and competitive parameters  
169 discussed above (Fig. 1Di). The steric pillars also stabilized a number of distinct ‘junctions’ between  
170 species, including free three-way junctions in open space (Fig. 1Dii), three-way junctions centered on a  
171 pillar (Fig. 1Diii), and four-way junctions centered on a pillar (Fig. 1Div). Isotropic systems can transiently  
172 support two-species interfaces and free three-way junctions (Fig. 1A), but the three- and four-way  
173 junctions centered on a pillar can only exist in systems with steric objects. Junctions centered on pillars  
174 can support more than four species if pillars are large in comparison to the length scale (thickness) of the  
175 interface, though these did not occur in our simulations with random initial conditions – we only observed  
176 these higher-species junctions under contrived conditions (see SI Fig.2).

177

### 178 **Stabilization is robust to fluctuations in structure and competition asymmetries**

179 Next we held the degree of structural disorder fixed at zero ( $\delta = 0$ ) and explored how changes in the  
180 structural scale affected the number of stably coexisting species. Along one dimension, we held  $\langle P \rangle =$

181 0.25 and varied the interaction parameter  $\Delta P$  subject to the constraint that  $\Delta P/2 < \langle P \rangle$ , which ensured  
182 that all *in silico* ecosystems remained in the ATA graph class. Along a second parametric dimension, we  
183 varied the structural scale while holding pillar radii fixed. In Fig. 2 we measured the mean number of  
184 species at equilibrium as a function of both the width of the interaction-parameter distribution and the  
185 structural scale, with 30 replicates per parameter set for a total  $\sim 11,000$  simulations. Consistent with  
186 previous work on two-species systems<sup>70</sup>, the average number of surviving species declined sharply both  
187 as competition asymmetry increased (i.e. as  $\Delta P/\langle P \rangle$  increased) and as the structural scale increased.  
188 Conversely, systems with smaller structural scales and/or smaller competitive asymmetries robustly  
189 retained all eight species in the long-time limit. The structural scale sets the maximum interface curvature  
190 that can exist in an ordered environment, and hence limits the values of  $\Delta P/\langle P \rangle$  for which all species can  
191 survive, that relationship is given by

$$192 \left(\frac{\Delta x}{R}\right)_{\text{crit}} = 2 \frac{\lambda}{R} \sqrt{1 + \left(\frac{\langle P \rangle}{\Delta P}\right)^2}$$

193 derived by setting the maximum geometric curvature equal to the curvature due to competitive  
194 asymmetry (see SI of <sup>70</sup>). This relationship approximates the boundary between the regime of stable  
195 coexistence of all species and reduced species coexistence, as shown overlaid on Fig. 2.

196 While these results are supportive of the stabilizing effect of steric structure on long-term species  
197 coexistence, rarely do natural environments contain highly ordered ( $\delta = 0$ ) steric structures, thus we  
198 explored how disorder affects species abundance at a fixed structural scale. First, we simulated the  
199 simpler case where all eight species had balanced competitive interactions (like Fig. 1) and examined the  
200 population dynamics in the presence of disordered steric structures ( $\delta = 1$ ). Like the ordered case,  
201 disordered systems with balanced competitive interactions displayed stable representation of all eight  
202 species (Fig. 3A). We then compared the probability distribution for the number of coexisting species at  
203 equilibrium across four conditions (1,000 simulations for each): with and without competitive asymmetry,  
204 and with and without structural disorder, as shown in Fig. 3B. When  $\Delta P/\langle P \rangle = 0$  the number of species  
205 remained at the maximum value across all 1,000 simulations whether or not the steric structures were  
206 disordered. When competitive asymmetry was introduced the probability distribution for the number of  
207 stably coexisting species expanded across all possible values (1 to 8) and peaked between 6 and 7 species,  
208 regardless of whether the system was ordered or disordered. Those distributions were quantitatively  
209 similar, indicating that disorder was not a strong determinant of stable species coexistence.

210 We examined the survival probability distributions and applied the simplest possible rule that emerges  
211 from the statistical ensemble of initial conditions, competitive asymmetries, and disorder. For a given set  
212 of conditions we assumed that there is some probability  $\alpha$  that a species randomly selected from the full  
213 ensemble will survive in the long-term. This corresponds to a binomial distribution whose normalization  
214 is modified to account for the fact that there is no chance that all  $N$  species will die

$$215 \quad p_n(N, \alpha) = \frac{N! \alpha^n (1 - \alpha)^{N-n}}{n! (N - n)! (1 - (1 - \alpha)^N)}$$

216 where  $N$  is the maximum (initial) number of species and  $p_n$  is the probability of  $1 \leq n \leq N$  species  
217 coexisting at equilibrium. We used maximum-likelihood estimation to fit this model to the survival  
218 distributions and thus determined the value  $0 < \alpha < 1$  that corresponds to the ensemble average  
219 probability that any single species survives in equilibrium given the number of species  $N$ , simulation size  
220  $L$ , structural parameters  $\Delta x$  and  $R$ , the disorder  $\delta$ , and sampling parameters  $\langle P \rangle$  and  $\Delta P$ ; the exact  
221 functional dependence between those parameters and  $\alpha$  is not yet clear. This model captures the bulk of  
222 the survival distributions and mis-estimates the occurrence of rare events compared to the raw data. The  
223 fit values demonstrate that smaller systems and systems with higher competitive asymmetries both have  
224 lower per-capita survival probabilities ( $\alpha$ ). For instance, examining systems with higher competitive  
225 asymmetry, we found that larger systems ( $L = 150$ ) with or without disorder had quantitatively similar  
226 survival probabilities –  $\alpha = 0.746_{-0.010}^{+0.009}$  and  $\alpha = 0.767_{-0.009}^{+0.009}$  respectively – whereas under the same  
227 conditions a smaller system ( $L = 75$ ) had survival probabilities of  $\alpha = 0.600_{-0.011}^{+0.011}$  and  $\alpha = 0.626_{-0.011}^{+0.011}$ ,  
228 respectively (See SI Fig. 3).

229 We used those same 4,000 simulations to assess the variability in the amount of area that each species  
230 occupied at equilibrium divided by the total simulation area, giving a dimensionless quantity bounded  
231 between 0 and 1 that characterizes variability in species abundance. For each set of parameters, we  
232 measured the standard deviation in abundance across all species and all replicates to generate a  
233 probability distribution for the degree of variation – values closer to zero indicate that all species have  
234 roughly the same abundance. In the case of balanced competitive interactions, the probability  
235 distributions for abundance variations were nearly identical for the ordered and disordered systems, and  
236 the mean value of the variation was low ( $\sim 0.05$ ), meaning that if competitive interactions are balanced all  
237 species are have roughly the same abundance. However, introducing moderate competitive asymmetry  
238 meant that some species intrude into the territory of other species, leading both to lower species diversity  
239 and to larger variations in species abundance. As such, we report the distribution of abundance variations



240 for all simulations that had equilibrium species numbers of  $S = 6, 7$  and  $8$  (Fig. 3 C). Again, disorder had  
241 little effect on those probability distributions. Systems that experienced extinctions of zero ( $S = 8$ ), one ( $S$   
242  $= 7$ ) or two ( $S = 6$ ) species had a higher mean variation (by a factor of 3 to 5) and wider distribution of  
243 variations as compared to balanced competition. Additionally, we performed a wider sampling of the  
244 degree of disorder and the competitive asymmetry, and found that the average number of stably surviving  
245 species showed little dependence on the degree of structural disorder (Fig. 3D). When we correlated the  
246 mean number of surviving species as a function of the competitive asymmetry across all values of  $\delta$ , the  
247 average correlation coefficient was 0.97 (see SI Fig. 4), meaning that the relationship between average  
248 number of surviving species and competitive asymmetry showed little dependence on disorder in the  
249 range  $0 \leq \delta \leq 1$ .

250 As a final characterization of spatial structure, we examined the density with which interspecies  
251 boundaries connect steric objects. Ignoring edge cases, every steric object has a set of Voronoi nearest  
252 neighbors, typically 5 to 7 in disordered systems and exactly 6 in a triangular lattice (see SI Fig. 5). Across  
253 our simulations, the vast majority ( $\sim 98\%$ ) of all interspecies boundaries connected pillars that were  
254 Voronoi nearest neighbors, which is expected given geometric constraints. The number of those  
255 connections per unit area relative to the total number of possible Voronoi connections per unit area is a  
256 dimensionless measure of the amount of competition in a physically structured system – below we refer  
257 to this as the ‘connection density’, whose values lie between 0 and 1. When examined through that lens,  
258 disorder, at least for balanced interactions, had a significant effect on the distribution of connection  
259 densities across the ensemble of simulations, with ordered systems exhibiting higher connection densities  
260 (see SI Fig. 5). However, when examined under moderate levels of competitive asymmetry connection  
261 density significantly decreased (consistent with abundance variation increasing) and the difference  
262 between ordered and disordered systems again became small. These data suggest that structured systems  
263 with higher levels of competitive asymmetry, somewhat counterintuitively, have lower levels of  
264 competition as measured by the density of competitive interfaces in the system, because boundaries  
265 between mismatched competitors are less stable.

266

### 267 **Structure stabilizes larger numbers of species with system-size dependence**

268 All of the simulations discussed up to this point were performed within the same size grid  $L = 150$  (with  
269 the exception of SI Fig. 3,  $L = 75$ ). Under any set of parametric conditions, the absolute minimum domain

270 size for a given species is set by the area of a triangle formed by three pillars that are all mutual Voronoi  
271 neighbors (so-called ‘Delaunay triangles’<sup>80</sup>), thus *any* system that is not large enough to contain domains  
272 of at least that size for each of  $N$  unique species cannot support all  $N$  species – this establishes a minimum  
273 system size for a particular number of species that scales as  $N(\Delta x)^2$ . However, disordered systems have  
274 an additional system-size dependence – all else being equal, as the system size grows the probability  
275 distribution for the equilibrium number of species (e.g. Fig. 3B) shifts toward the maximum number of  
276 species (i.e.  $\alpha \rightarrow 1$ ). The mechanism behind this shift is that as the system increases in size, there are more  
277 opportunities for disordered steric objects to create a zone in which a weaker competitor is enclosed by  
278 an effectively smaller structural scale. We confirmed this by measuring the system size-independent  
279 distribution of local structural scale (SI Fig. 6). In an ordered system, the distribution of local structural  
280 scale is a delta-function centered on the lattice constant. As disorder increased we found that Voronoi  
281 zones emerged whose maximum convex edge-length was smaller than the lattice constant, meaning these  
282 were zones in which a species that would be too weak to compete in an ordered system, could potentially  
283 survive. The average number of these zones per unit area is scale-independent, thus increasing system  
284 size linearly increases the average number of those zones, and thus the per-capita survival probability  $\alpha$   
285 increases (e.g. compare Figs. 3B and SI Fig. 3), as does the survival probability of weaker competitors.

286 Finally, in an ordered system we explored the effects of system size and competitive asymmetry as a  
287 function of the initial number of species, across the range  $2 \leq N \leq 12$ . First, we measured the ensemble  
288 survival probability ( $\alpha$ ) as a function of both competitive asymmetry and the initial number of species,  
289 with 50 replicates for each parameter set (Fig. 4A). For low competitive asymmetry across all values of  $N$ ,  
290 the ensemble survival probability was approximately 1, meaning all species survived, and hence the initial  
291 and final species numbers were equal. However, similar to Fig. 2, as competitive asymmetry increased  
292 species loss increased ( $\alpha$  decreased), and the decrease in  $\alpha$  was more dramatic the larger the initial  
293 number of species. One potential mechanism behind this species-number dependent change in  $\alpha$  is that  
294 larger values of  $N$  offer a wider sampling of the matrix elements  $P_{ik}$ , and thus increase the likelihood that  
295 a single competitor dominates over many other weaker species and/or that ‘ultra weak’ competitors  
296 emerge.

297 Another potential link between species-number and decreasing  $\alpha$  was system-size. To test this, we ran  
298 simulations across the same range of species number at the highest value of competitive asymmetry for  
299 two different system sizes ( $L = 100$  and  $L = 200$ ). For both system sizes, survival probability dropped as  
300 species number increased (Fig. 4B), but the smaller system experienced a significantly faster drop in

301 survival probability with species number. This indicates that decreasing system size accounts for part, but  
302 not all, of the decrease in survival probability. We also examined the role of disorder in this context;  
303 consistent with our previous results disorder had a relatively minor effect as determined by 95%  
304 confidence intervals of MLE for the values of  $\alpha$  (see SI Fig. 7 for confidence intervals). Together, these  
305 results add support to the finding that disorder at a fixed structural scale is not a strong determinant of  
306 stable biodiversity, but that system size and the number of initially competing species each modulate  
307 survival probability and hence equilibrium biodiversity.

308

## 309 **DISCUSSION**

310 In this work we used simulations to provide evidence that – within a range of structural scales and  
311 competitive parameters – the class of ecological graphs encompassed by all-to-all (ATA) competition is  
312 stable in structured environments. Other well-known ecological ‘games’, such as rock-paper-scissors (RPS)  
313 and its higher species-number analogs<sup>73,81</sup>, also reside within the ATA graph class. That is, values in the  
314 matrix  $P$  that produce stable intransitive (e.g. RPS) oscillations adhere to the same conditions as the ATA  
315 class, but are subject to additional constraints on their relative values. The RPS sub-class distinguishes  
316 itself by exhibiting two important features. First, unlike non-oscillatory systems that lie within ATA,  
317 oscillatory systems with spatial isotropy can exhibit stable representation of all species<sup>43,71,82</sup>, albeit with  
318 each species in constant spatial flux. Second, our previous work showed that in a symmetric game of RPS<sup>70</sup>,  
319 structure could have a destabilizing effect that ultimately led to extinction cascades ending with a single  
320 dominant species. Thus, while the vast majority of parameter combinations for  $P_{ik}$  likely yield systems that  
321 are stabilized by structure, RPS graphs present the possibility of being destabilized by structure. Given  
322 that virtually all natural environments present structural anisotropy, destabilization of RPS networks due  
323 to structure may contribute to answering why RPS networks are only rarely observed outside of the  
324 lab<sup>21,83–85</sup>.

325 Similarly, systems in which species cooperate or have competitive alliances – neither of which lie within  
326 the ATA graph class – can, by virtue of the specific localization of each species, be stabilized by structure.  
327 For instance, consider the simplest, non-ATA graph for which this can be true:  $A$  and  $B$  compete,  $B$  and  $C$   
328 compete, and  $A$  predaes  $C$  (see SI Fig. 8A). If in a structured environment species  $C$  is stably and spatially  
329 isolated from  $A$  by the arrangement of  $B$ , then all three species will stably coexist due to the effects of  
330 physical structure, even though an interspecies boundary between  $A$  and  $C$  is unstable regardless of

331 structural parameters. The idea that specific spatial arrangements of species can be stable in a structured  
332 environment extends to other non-ATA graphs (e.g. SI Fig. 8B), and is consistent with established findings  
333 that spatially structured communities maintain biodiversity by localizing interactions among community  
334 members<sup>86–88</sup>. This also suggests the possibility that physical structure and positioning of species play a  
335 role in shaping their ecological and evolutionary relationships. Thus assessing the interplay between  
336 physical structure, graph structure, and ecological dynamics is a rich area of inquiry, one in which structure  
337 may play a qualitatively important role.

338 For simplicity and ease-of-display we explored 2D systems in this work, however many natural systems  
339 are three dimensional. This work does not allow us to directly comment on what will happen in 3D  
340 systems, however: (i) graph structure and its attendant parameters as encoded by the interaction matrix  
341 are independent of dimensionality, (ii) the relationship between interface curvature and competitive  
342 asymmetry that underlies many of the results herein described have a natural extension into three  
343 dimensions, where the mean curvature of the 2D interspecies boundary in 3D space plays the analogous  
344 role as 1D curvature of a line interface in 2D space, and (iii) the measures herein described (e.g.  
345 dimensionless disorder, structural scale, connection density, survival probabilities, etc.) have natural  
346 extensions into 3D, meaning that direct comparisons can be made between 2D and 3D systems. Similarly,  
347 there are illuminating comparisons to be made with other physical and biological systems, in particular  
348 the pinning phenomena that here slow or halt genetic coarsening play important roles in domain-wall  
349 stabilization in Ising-like systems due to pinning at random spatial impurities<sup>89</sup>, pinning-induced  
350 transitions of super-cooled liquids into glassy states<sup>90</sup>, arrest of lipid-bilayer domain coarsening in the  
351 presence of biopolymers that impose structure on the bilayer<sup>91</sup>, and have been shown to impact  
352 genotype-specific range expansion<sup>92</sup>. Likewise, other physical mechanisms, such as flow<sup>93</sup>, have been  
353 found to slow or halt coarsening in phase-separating systems, and still other work focuses on flow<sup>94,95</sup> or  
354 chemical gradients<sup>96</sup> in structuring communities. Thus structure is one of multitude physical mechanisms  
355 shaping communities in complex environments.

356 Finally, even within this 2D reductionist framework we wonder how robust are pinned competition  
357 interfaces to: (i) stochastic spatial fluctuations caused either by finite organism size or other forms of  
358 motility (besides diffusion), (ii) tunable interaction strengths, such as with competition sensing<sup>97,98</sup>, or (iii)  
359 phenotypic differentiation<sup>99</sup>? Whether the details of interactions matter<sup>69</sup> or not<sup>100</sup>, the stabilizing effect  
360 of structure is fundamentally related to how interspecies boundaries – which appear in many extensions  
361 of the LV model – interact with the boundary conditions imposed by structure, and hence we anticipate

362 that qualitatively, these results extend to a wider class of boundary-forming models (e.g. incorporating  
363 Allee effects<sup>70</sup>). Ultimately, an understanding of the interplay between ecological relationships,  
364 environmental structure, and other physical factors (like flow or chemical gradients) paves the way toward  
365 rational design of structured environments that tune the range of competitive asymmetries and/or  
366 stochastic fluctuations that an environment can stably support, and shift system dynamics and stability to  
367 favor particular species or interaction topologies.

368

## 369 **METHODS**

370 In the 2D simulation space, each species was seeded by randomly choosing 0.2% of all valid pixels in the  
371 simulation box and setting the concentration of that species to  $1/N$  of the carrying capacity, where  $N$  is  
372 the number of species being simulated; each species was represented by its own field matrix. Steric pillars  
373 were placed with the specified radius  $R$ , spacing  $\Delta x$ , and degree of disorder  $\delta$  within a simulation box  
374 whose side lengths were  $L$ . All reported length measures ( $R$ ,  $L$ ,  $\Delta x$ ) are in units of  $1.29\lambda$ , with the  
375 computational pixel scale set so that  $1.29\sqrt{D} = 1.29\lambda = 5$ . Microbial density that coincided with pillar  
376 locations was removed from the simulation. The bounding box and pillar edges were modeled as reflecting  
377 boundary conditions. At each simulated time step ( $\Delta t = 0.01t$ , with  $t$  in inverse growth rate), populations  
378 diffused via a symmetric and conservative Gaussian convolution filter with standard deviation set by the  
379 diffusion coefficient,  $\sigma = \sqrt{4D\Delta t}$ . After the diffusion step, changes in population density (growth and  
380 death) were calculated using the equations given in the main text, and used to update the density of each  
381 species matrix according to a forward Euler scheme. In combination with the small dimensionless time-  
382 step and concentration-conserving convolution filter, hard upper and lower bounds (1 and 0 in units of  
383 carrying capacity, respectively) were enforced on each species field to ensure numerical stability of  
384 simulations; populations densities outside this range were set to 1 and 0, respectively. We monitored a  
385 subset of the simulations and found that simulations were sufficiently stable that those hard limits were  
386 never encountered. For each set of structural scale ( $\Delta x/R$ ) and competitive asymmetry ( $P_{ik}$ ) values, 30 to  
387 50 independently initialized replicates were simulated for 5000 doubling times or until equilibrium was  
388 reached, as defined by spatially averaged change in all species matrices falling below 0.001 between time  
389 steps. Mean population abundances of the simulation were recorded at an interval of  $100 \Delta t$  for the  
390 duration of the simulation. Extinction was defined as the mean population density of any species dropping  
391 below a threshold value of  $((2R)^2 - \pi R^2)/4A$ , where  $R$  is the pillar radius and  $A$  the area of lattice points  
392 not obstructed by pillars. This non-zero threshold accounts for surviving populations ‘trapped’ between a

393 pillar and the corner of the simulation box and therefore not in contact with the rest of the simulation;  
394 this threshold value lies well below the minimum set by the local Delaunay triangulation.

395 To create a controlled level of pillar-position disorder, each pillar center was displaced from a triangular  
396 lattice in a random direction by an amount drawn from a uniform random distribution whose width is  
397 characterized by the dimensionless parameter defined as  $\delta = 2w/(\Delta x - R)$ , where  $w$  is the width of the  
398 uniform distribution. The competition parameters between all species were generated by choosing the  
399 mean strength of competition  $\langle P \rangle$  and then sampling a uniform random distribution of width  $\Delta P$  about  
400 that mean for each directed interaction (i.e. the interaction matrix is not symmetric), subject to the  
401 constraint that  $\Delta P/2 < \langle P \rangle$ , which ensures that all random samplings remain in the ATA graph class.

#### 402 *Model Fitting*

403 Fitting to the modified binomial distribution was performed using maximum-likelihood estimation with  
404 all 1,000 simulations for each set of conditions; reported uncertainties for  $\alpha$  are 95% confidence intervals.

#### 405 *Data availability*

406 Code files to run simulations and analyses are available as supplemental files that can be downloaded on  
407 the publisher website. Raw simulation output is available upon request.

408

#### 409 **ACKNOWLEDGEMENTS**

410 We thank Nick Lowery for helpful discussions and comments on the manuscript and Rob Yelle for  
411 assistance with high performance computing resources at the University of Oregon. Research reported  
412 in this publication was supported by the University of Oregon.

413

414

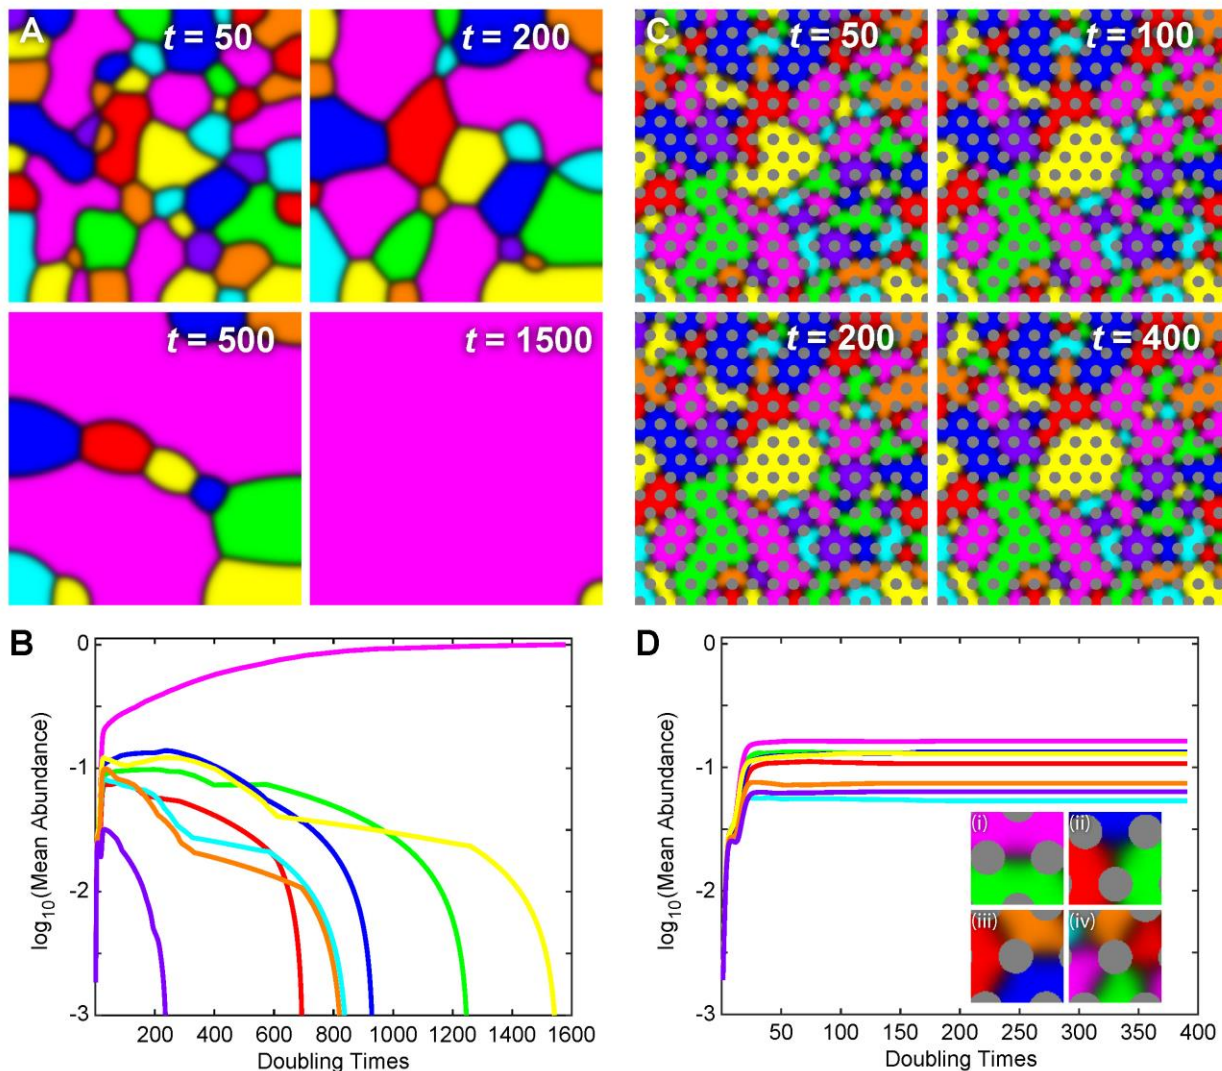

415  
 416 **Figure 1: Steric structures stabilize an *in silico* multi-species ecosystem.** Shown here are two 8-species  
 417 *in silico* ecosystems in which all species are actively competing with all other species and the competition  
 418 parameters are equal for all pairwise interactions. **(A & B)** Simulation of competition in an isotropic  
 419 environment. If initial species representation is statistically equal, each species has equal probability of  
 420 dominating the environment in the long-time limit. However, in any single simulation the dynamics of  
 421 interspecies boundaries lead to a single dominant competitor in the long-time limit. **(C & D)** When species  
 422 compete in an environment with ordered steric structures ( $R = 3$ ,  $\Delta x/R = 3.5$ , and  $\delta = 0$ ), interspecies  
 423 boundaries that are mobile under isotropic conditions quickly ‘pin’ between steric objects and arrest the  
 424 genetic-phase coarsening that leads to a single dominant competitor, thereby robustly producing stable  
 425 representation of all species. Steric structures also permit situations where 3 or more species form a  
 426 ‘junction’ around a steric object (Diii and Div). In both simulations  $L = 150$ ,  $\langle P \rangle = 0.25$ , and  $\Delta P = 0$ .

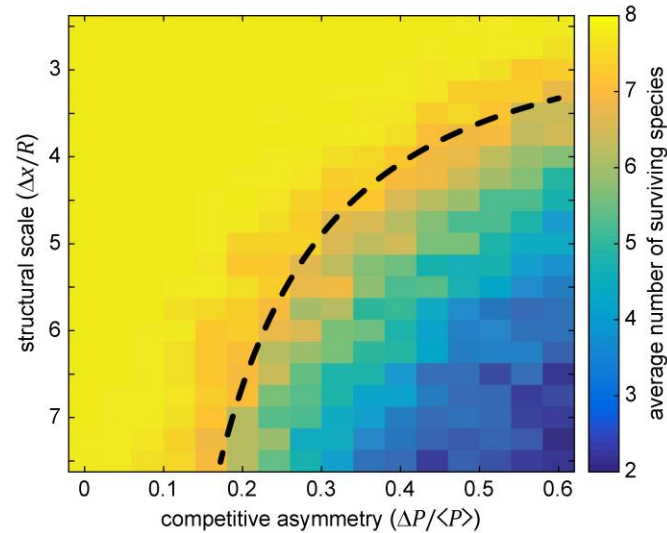

427

428 **Figure 2: The number of species an environment can stably support depends on the degree of**  
429 **competition asymmetry and the structural scale.** Simulations were performed across a range of  
430 competitive asymmetries characterized by the dimensionless parameter  $\Delta P/\langle P \rangle$  and across a range of  
431 structural scales characterized by the dimensionless parameter  $\Delta x/R$ . Each pixel corresponds to the mean  
432 of 30 simulations each with a unique random sampling of initial conditions (as described in Methods), a  
433 unique random sampling of the interaction matrix elements using  $\Delta P$  and  $\langle P \rangle$ , and a fixed structural scale.  
434 Structural scale and competitive asymmetry were both potent modulators of species coexistence, with  
435 smaller structural scale and lower competitive asymmetries leading to stable representation of all species  
436 (yellow region). The black dashed line is a zero-fit parameter model relating the competitive asymmetry  
437 to the maximum curvature possible for a given structural scale, showing that relatively simple geometric  
438 considerations capture the onset of species loss. In all simulations  $L = 150$ ,  $\langle P \rangle = 0.25$ ,  $R = 3$ , and  $\delta =$   
439 0.



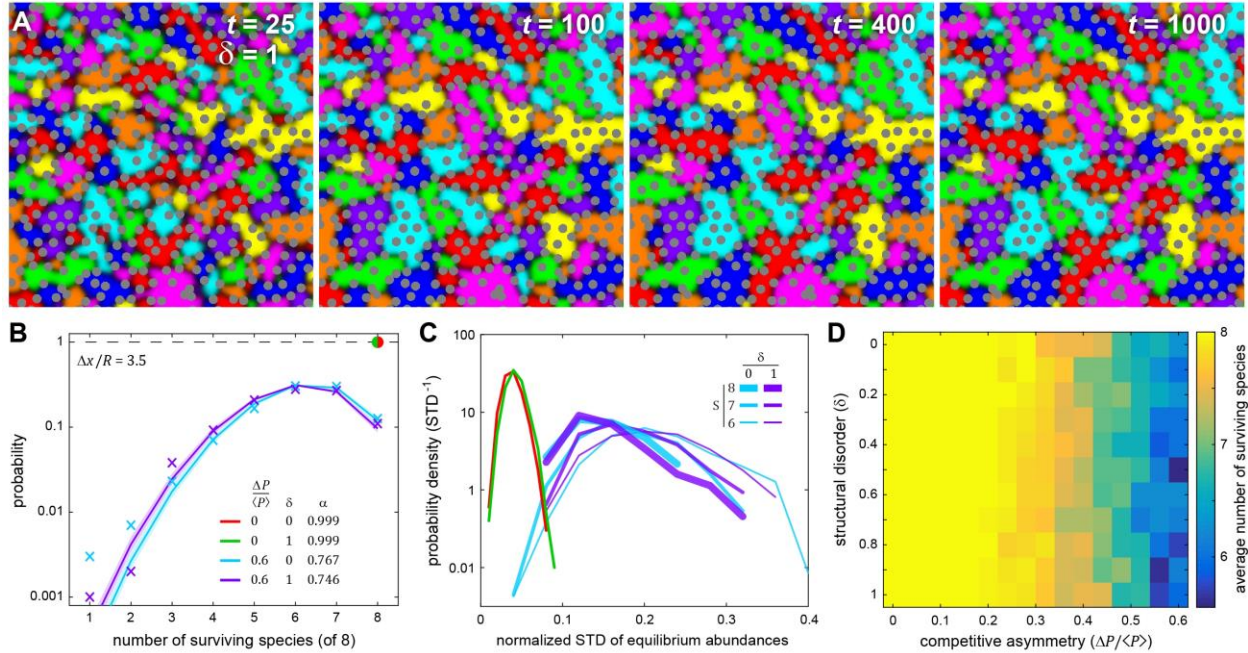

440

441 **Figure 3: Species coexistence is robust in the presence of structural disorder.** (A) Similar to Fig. 1C, these  
 442 panes show the time evolution of an 8-species system where steric pillars were randomly perturbed from  
 443 a perfect triangular lattice ( $\delta = 1$ ). From random initial conditions the system rapidly equilibrated to a  
 444 stable configuration that supported all 8 species. (B) Simulations were performed to measure the  
 445 probability distribution for the number of surviving species under four conditions (1,000 each): high and  
 446 low competitive asymmetry and high and low structural disorder. The structural scale was held fixed.  
 447 Without competitive asymmetry all species survived in all simulations, with or without disorder  
 448 (red/green dot). With high competitive asymmetry, the probability distributions spread across all possible  
 449 numbers of species with relatively little distinction between ordered and disordered systems (colored X's).  
 450 Those distributions were well-described by a modified binomial distribution (solid lines) with an ensemble  
 451 average single-species survival probability of  $\alpha \sim 0.75$ . The distributions exhibit larger variation where  
 452 there are less data (i.e. lower probabilities, from one to three surviving species). (C) For each simulation,  
 453 the normalized standard deviation (NSD) in equilibrium abundances was measured, and those values are  
 454 shown here as a histogram for each of the four conditions. In the absence of competitive asymmetry  
 455 (green, red), the mean NSD was low ( $\sim 0.05$  on maximum scale of 1). When competitive asymmetry was  
 456 high, we examined the NSD for all simulations that had 6, 7, or 8 surviving species (cyan, purple). All of  
 457 those distributions were significantly wider and had significantly higher mean NSD's, meaning that  
 458 competitive asymmetry increases the variation in species abundance at equilibrium, regardless of how  
 459 many species stably coexist. (D) We compared the average number of surviving species across a range of  
 460 competitive asymmetry and disorder ( $0 \leq \delta \leq 1$ ). Those distributions showed little variation with  
 461 disorder and, as a function of competitive asymmetry, had a mean pairwise correlation of 0.97 (see SI Fig.  
 462 4). Thus our data suggest that structural scale has a stronger effect than disorder (at least over this range).  
 463 In all simulations  $L = 150$ ,  $\langle P \rangle = 0.25$ , and  $R = 3$ .

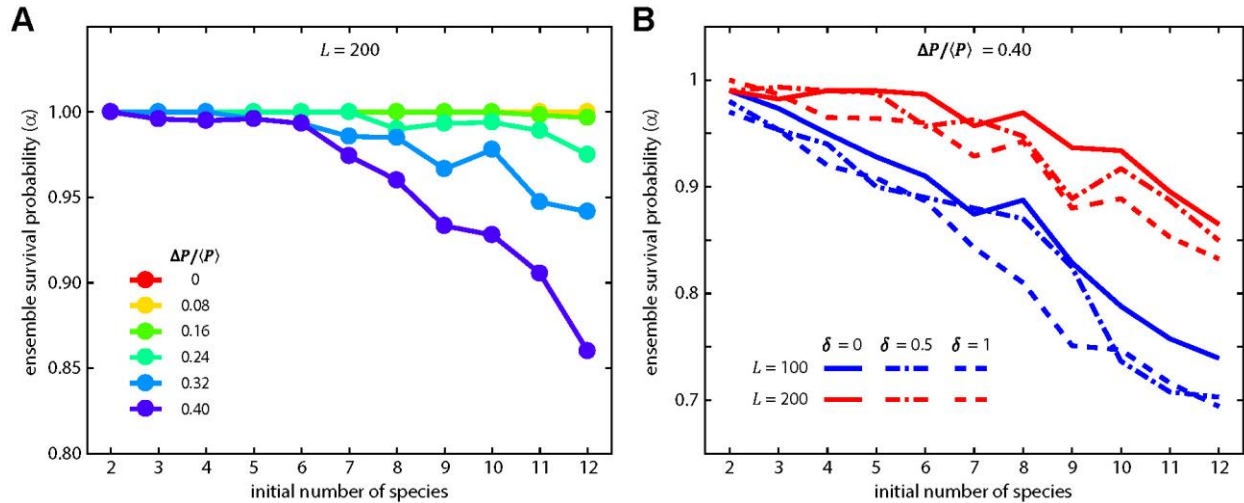

464

465 **Figure 4: Structure stabilizes larger numbers of species, but increasing competitive asymmetry**  
 466 **increases species loss. (A)** Holding the structural scale fixed with no disorder, we measured the survival  
 467 probability as a function of the initial number of species, between 2 and 12, across multiple values of  
 468 competitive asymmetry. For lower values of competitive asymmetries, the final and initial numbers of  
 469 species were essentially equal ( $\alpha \sim 1$ ). Higher levels of competitive asymmetry resulted in increasing  
 470 degrees of species loss as the number of species increased. This amplification of species loss is related, at  
 471 least in part, to the same interplay between structural scale and maximum interface curvature that caused  
 472 species loss in Fig. 2. **(B)** Comparing identical conditions between two different system sizes ( $L = 100$   
 473 and  $L = 200$ ), the effects of disorder are relatively small in comparison to the effects system size, with  
 474 smaller system sizes (blue lines) showing a significant amplification of reduction in survival probability as  
 475 compared to the larger system. In all simulations  $\langle P \rangle = 0.25$  and  $R = 3$ .

476  
477  
478  
479

Supplementary Information:  
**Competitive ecosystems are robustly stabilized by structured environments**  
Tristan Ursell, Department of Physics, University of Oregon

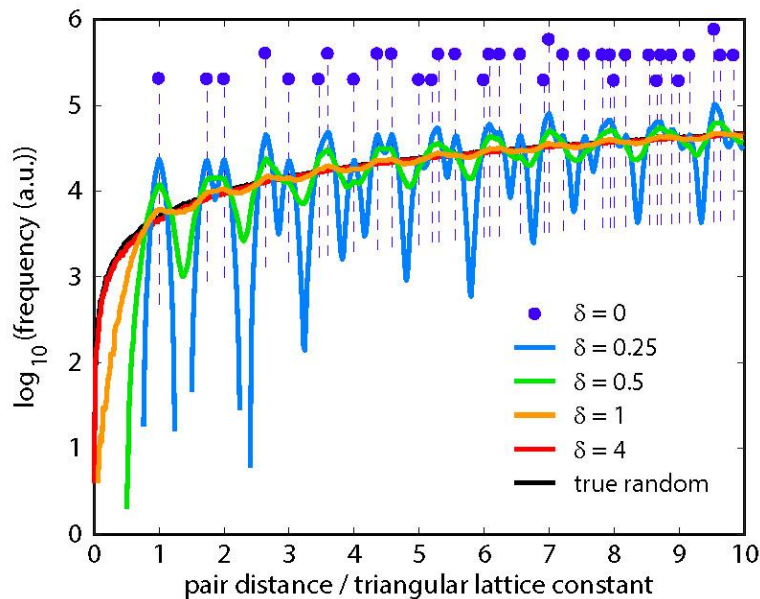

480

481 **SI Figure 1.** The pairwise distance distribution as a function of the disorder parameter  $\delta$ . The distribution  
482 of separations between any two steric pillars does not depend on the size of the space in which those  
483 objects exist, assuming that the density of those objects is held fixed. For a perfect triangular lattice ( $\delta =$   
484 0), that distribution is a series of delta-functions (purple dots). Adding structural disorder ( $\delta > 0$ ) makes  
485 the distributions continuous, with increasing degrees of disorder ultimately approaching the distribution  
486 expected for randomly placed objects at a fixed density (black line). As  $\delta$  increases, the arrangement of  
487 steric pillars transitions smoothly from a triangular lattice to a random arrangement – in this work, we  
488 explored  $0 \leq \delta \leq 1$ .

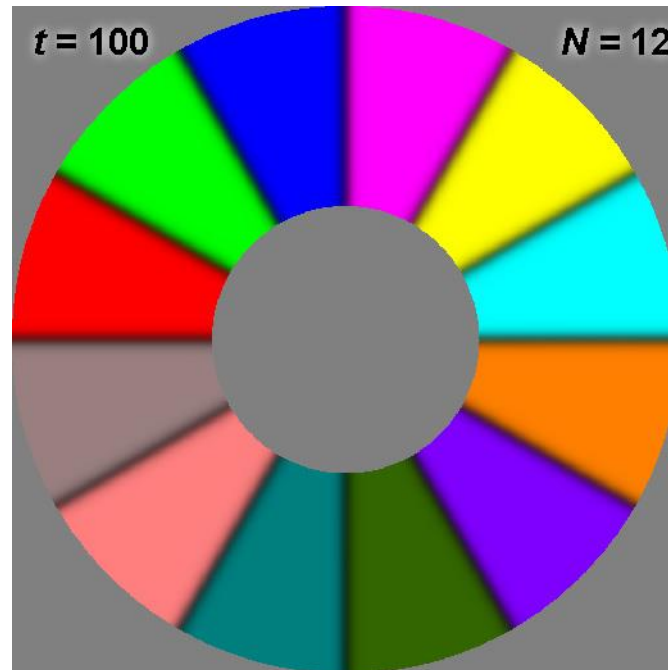

489

490 **SI Figure 2.** Here a simulation is contrived via initial conditions to have 12 species stably coexist, each  
491 making contact with the same steric object (gray circle in the center). The outer edge is also circular which  
492 permits stable coexistence of multiple species in a single open space. This figure demonstrates that, for a  
493 sufficiently large steric object as compared to the width of the interspecies transition zone, any number  
494 of species can 'share' a boundary with an object. However, in an environment with many steric objects  
495 in proximity, the local Voronoi neighborhood limits the maximum number of species that can exist around  
496 an object, usually to 3 or 4.

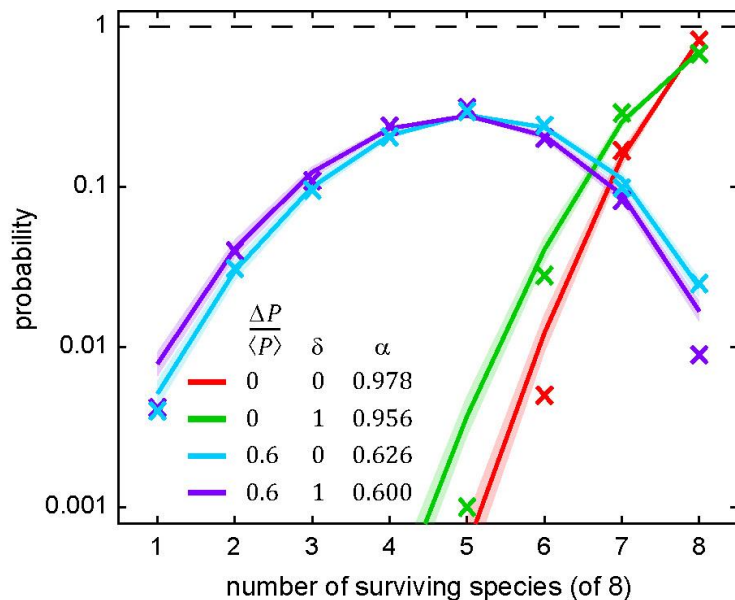

497

498 **SI Figure 3.** The type and format of data herein presented are the same as in Fig. 3B – the only difference  
 499 is that here the simulation box is half the linear size (1/4 the area). Simulations were performed to  
 500 measure the probability distribution for the number of surviving species under four conditions (1,000  
 501 each): high and low competitive asymmetry and high and low structural disorder. The structural scale was  
 502 held fixed. We used a maximum likelihood estimator (MLE) to measure the ensemble average survival  
 503 probability ( $\alpha$ ) under those four conditions. Without competitive asymmetry (red and green X's), the  
 504 number of surviving species was heavily weighted toward the maximum possible number (8). With high  
 505 competitive asymmetry, the probability distributions spread across all possible numbers of species with  
 506 relatively little distinction between ordered and disordered systems (cyan and purple X's). In all instances,  
 507 the corresponding MLE fits are shown as solid lines. These results support the hypothesis that, regardless  
 508 of structural scale, smaller environments hinder long-term species coexistence. In all simulations  $L = 75$ ,  
 509  $\langle P \rangle = 0.25$ , and  $\Delta x/R = 3.5$ .

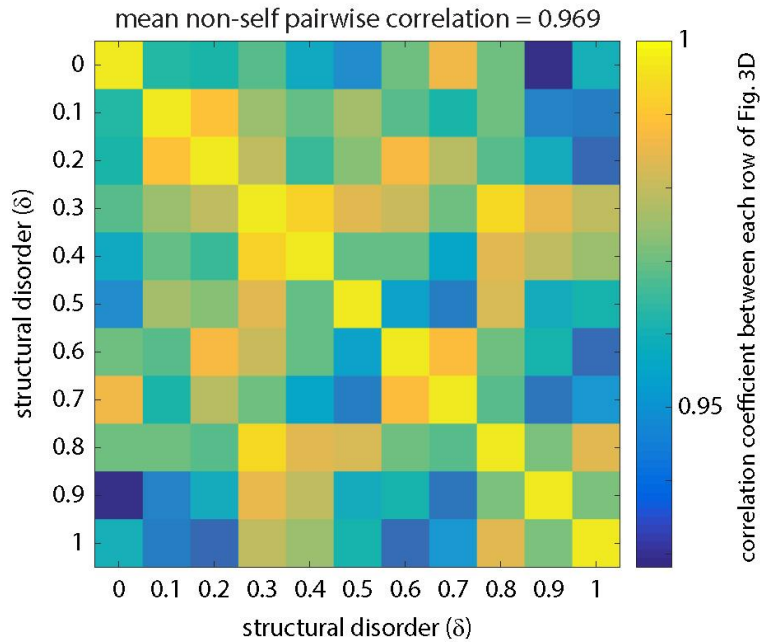

510

511 **SI Figure 4.** To determine the impact of steric disorder on the mean number of surviving species,  
512 independent of the effect of competitive asymmetry, we correlated each row of Fig. 3D with every other  
513 row of the same figure (55 unique correlations). All of those correlations were greater than 0.928, and the  
514 mean of all of those correlations was 0.969, meaning that over a range of steric disorder the relationship  
515 between mean number of surviving species and competitive asymmetry was quantitatively similar.

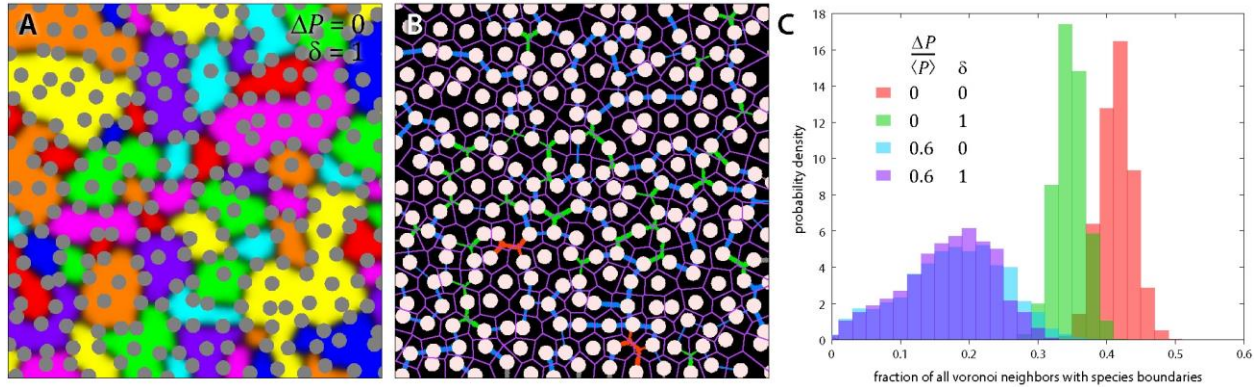

516

517 **SI Figure 5.** Using the same 4,000 simulations from Fig. 3, we examined the density of interspecies  
518 boundaries under those four conditions. **(A)** A sample image of 8 competing species in a disordered steric  
519 environment. Species establish spatial domains (solid colors) with dark boundaries between those  
520 domains where active competition takes places. **(B)** Across all simulations (though here for the same  
521 image as A), custom image analysis software examined the positions of each pillar (white) and the  
522 corresponding Voronoi tessellation (magenta tessellation) that indicates which pillars are Voronoi nearest  
523 neighbors. Image analysis algorithms segmented the interspecies boundaries between pillars and  
524 classified them according to how many pillars a boundary connected (blue = 2, green = 3, orange = 4).  
525 Approximately 2% of all connections were not Voronoi nearest neighbors (data not shown), and thus these  
526 connections were not used in this analysis. Boundaries that made contact with the edge of the simulation  
527 (gray) were not used in this analysis. **(C)** For each set of conditions, here shown as four colors (same colors  
528 as in Fig. 3B), we calculated the number of connections made by boundaries between Voronoi nearest  
529 neighbors as compared to the maximum possible number of boundaries (boundaries between all Voronoi  
530 nearest neighbors). While there is a notable difference between ordered and disordered connection  
531 density when competition is balanced (red and green), the salient difference is between balanced (red /  
532 green) and asymmetric (cyan / purple) competition. Systems with asymmetric competition have  
533 significantly fewer connections between objects, consistent with their higher abundance variability, and  
534 thus there is effectively less competition (i.e. fewer interfaces) in asymmetric systems.

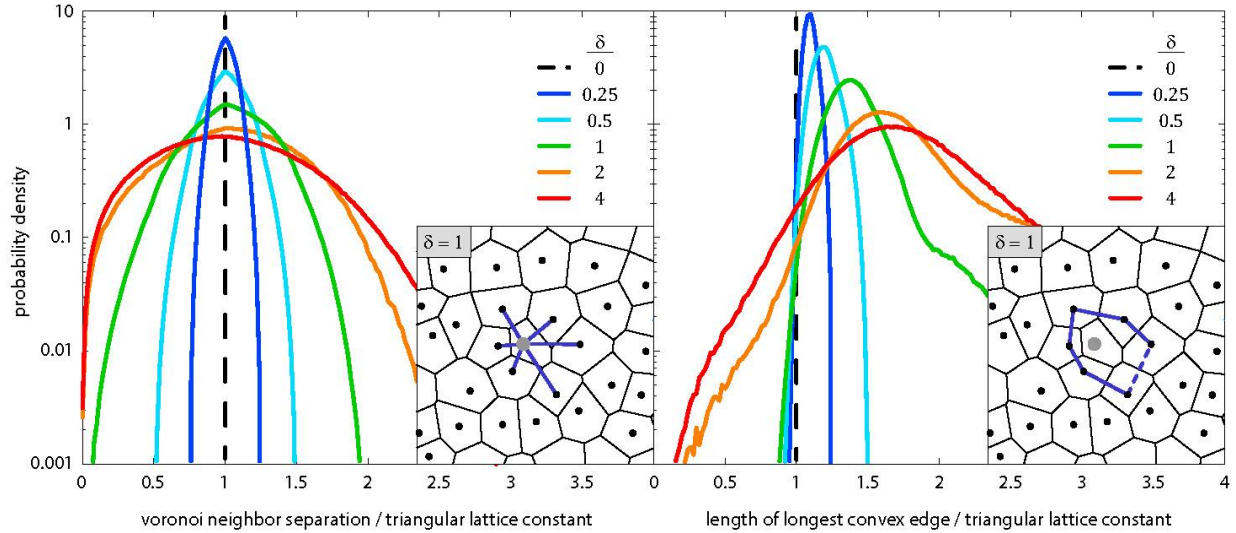

535

536 **SI Figure 6.** Local statistics of Voronoi tessellation as a function of the structural disorder. **(left)**  
537 Distributions of distances between Voronoi nearest neighbors. In a perfect triangular lattice this  
538 distribution is a delta-function (black dashed line). As disorder increases the distribution of nearest  
539 neighbor distances spreads out and a significant fraction of neighbors are found closer together than in a  
540 triangular lattice of the same overall density. The vast majority of interspecies boundaries are between  
541 Voronoi nearest neighbors. Thus widening of the distribution impacts whether a particular interspecies  
542 boundary is stable, because the maximum curvature and hence maximum competitive asymmetry that is  
543 stable at a boundary is set by the distance between the objects that the boundary connects. The inset  
544 shows an example of a Voronoi neighborhood and the local distances being measured (dark blue lines).  
545 **(right)** We examined hypothetical domains defined by the convex polygon around a steric object (see  
546 inset) – this defines a consistent region inside of which a competitor could stably exist (many other  
547 polygons could also be drawn). Across a large number of such polygon domains, we measured the  
548 distribution of longest edge lengths as a function of structural disorder. If the longest edge is less than the  
549 triangular lattice constant with the same overall density, then this domain is guaranteed to be more stable  
550 to competitive asymmetry than the corresponding ordered polygon. As disorder increases, the fraction of  
551 all such polygons that meet this more stringent stability condition increases, supporting the hypothesis  
552 that disorder should have a stabilizing effect when competition is asymmetric, contingent on there being  
553 a sufficiently large area and hence sufficient opportunities for such domains to exist.



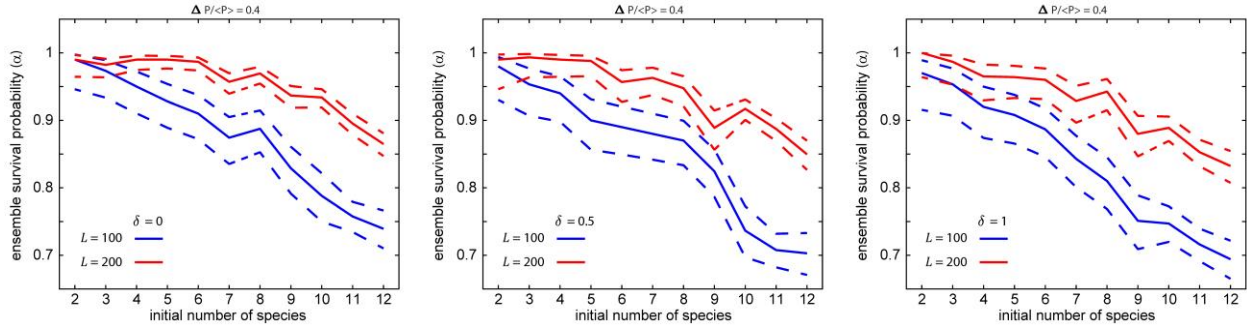

554

555 **SI Figure 7.** Same exact data as shown in Fig. 4B in the text, separated by value of  $\delta$  and shown with 95%  
556 confidence intervals (dashed lines) determined by maximum-likelihood estimation. Variations caused by  
557 differences in  $\delta$  are not significant, but variations caused by system-size differences are significant.

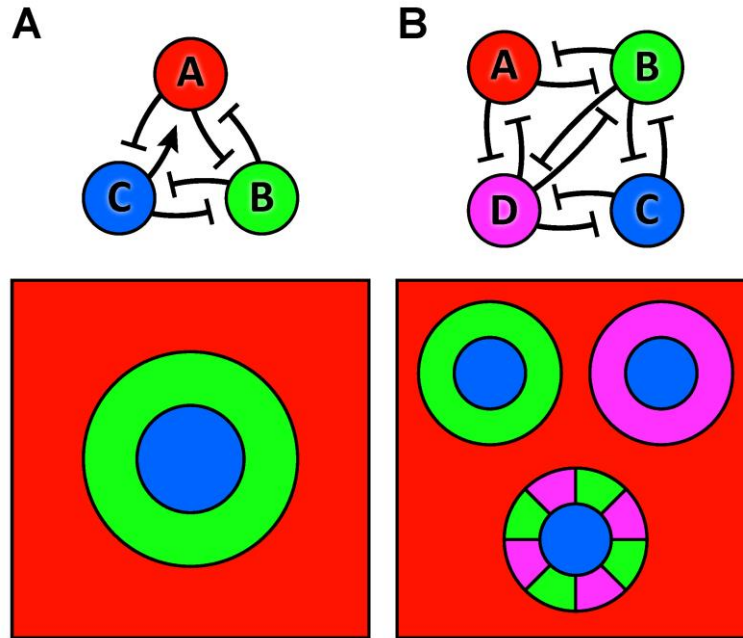

558

559 **SI Figure 8.** Spatial arrangements of species that support stability in non-all-to-all graphs. **(A)** The simplest  
560 example of a non-ATA graph (top) for which species abundances are stable in a structured environment –  
561 a single matrix element (arrow from C to A) breaks the ATA condition. The schematic (bottom) shows an  
562 arrangement of species that is stable, even though an interspecies boundary between A and C is not stable  
563 in any structured environment; this is the only arrangement that can stably support all three species for  
564 the graph shown. **(B)** A second, more complex example where four species can be arranged to yield stable  
565 abundances of all species, regardless of the interaction between species A and C (no connection shown).  
566 This graph admits three arrangements that allow A and C to coexist regardless of their interaction.

567 **REFERENCES**

- 568 1. Daniel, R. The metagenomics of soil. *Nat. Rev. Microbiol.* **3**, 470–478 (2005).
- 569 2. Stocker, R. & Seymour, J. R. Ecology and Physics of Bacterial Chemotaxis in the Ocean. *Microbiol.*  
570 *Mol. Biol. Rev.* **76**, 792–812 (2012).
- 571 3. The Earth Microbiome Project Consortium *et al.* A communal catalogue reveals Earth’s multiscale  
572 microbial diversity. *Nature* **551**, 457–463 (2017).
- 573 4. Melkonian, C. *et al.* Finding Functional Differences Between Species in a Microbial Community: Case  
574 Studies in Wine Fermentation and Kefir Culture. *Front. Microbiol.* **10**, 1347 (2019).
- 575 5. Hutchinson, G. E. The Paradox of the Plankton. *Am. Nat.* **95**, 137–145 (1961).
- 576 6. Gentry, A. H. Tree species richness of upper Amazonian forests. *Proc. Natl. Acad. Sci.* **85**, 156–159  
577 (1988).
- 578 7. Tilman, D. & Downing, J. A. Biodiversity and stability in grasslands. *Nature* **367**, 363–365 (1994).
- 579 8. Ptacnik, R. *et al.* Diversity predicts stability and resource use efficiency in natural phytoplankton  
580 communities. *Proc. Natl. Acad. Sci.* **105**, 5134–5138 (2008).
- 581 9. Blasius, B., Rudolf, L., Weithoff, G., Gaedke, U. & Fussmann, G. F. Long-term cyclic persistence in an  
582 experimental predator–prey system. *Nature* **577**, 226–230 (2020).
- 583 10. Levi, T. *et al.* Tropical forests can maintain hyperdiversity because of enemies. *Proc. Natl. Acad. Sci.*  
584 **116**, 581–586 (2019).
- 585 11. Kerr, B., Riley, M. A., Feldman, M. W. & Bohannan, B. J. M. Local dispersal promotes biodiversity in a  
586 real-life game of rock–paper–scissors. *Nature* **418**, 171–174 (2002).
- 587 12. Hoek, T. A. *et al.* Resource Availability Modulates the Cooperative and Competitive Nature of a  
588 Microbial Cross-Feeding Mutualism. *PLOS Biol.* **14**, e1002540 (2016).
- 589 13. Pennekamp, F. *et al.* Biodiversity increases and decreases ecosystem stability. *Nature* **563**, 109–112  
590 (2018).

- 591 14. Yu, X., Polz, M. F. & Alm, E. J. Interactions in self-assembled microbial communities saturate with  
592 diversity. *ISME J.* **13**, 1602–1617 (2019).
- 593 15. Adler, P. B., HilleRisLambers, J. & Levine, J. M. A niche for neutrality. *Ecol. Lett.* **10**, 95–104 (2007).
- 594 16. Tilman, D. Competition and Biodiversity in Spatially Structured Habitats. *Ecology* **75**, 2–16 (1994).
- 595 17. Hardin, G. The Competitive Exclusion Principle. *Science* **131**, 1292–1297 (1960).
- 596 18. Faust, K. *et al.* Microbial Co-occurrence Relationships in the Human Microbiome. *PLoS Comput. Biol.*  
597 **8**, e1002606 (2012).
- 598 19. Tilman, D. Niche tradeoffs, neutrality, and community structure: A stochastic theory of resource  
599 competition, invasion, and community assembly. *Proc. Natl. Acad. Sci.* **101**, 10854–10861 (2004).
- 600 20. Silvertown, J. Plant coexistence and the niche. *Trends Ecol. Evol.* **19**, 605–611 (2004).
- 601 21. Godoy, O., Stouffer, D. B., Kraft, N. J. B. & Levine, J. M. Intransitivity is infrequent and fails to  
602 promote annual plant coexistence without pairwise niche differences. *Ecology* **98**, 1193–1200  
603 (2017).
- 604 22. Wiles, T. J. *et al.* Host Gut Motility Promotes Competitive Exclusion within a Model Intestinal  
605 Microbiota. *PLOS Biol.* **14**, e1002517 (2016).
- 606 23. Hubbell, S. P. Neutral theory in community ecology and the hypothesis of functional equivalence.  
607 *Funct. Ecol.* **19**, 166–172 (2005).
- 608 24. McGill, B. J. A test of the unified neutral theory of biodiversity. *Nature* **422**, 881–885 (2003).
- 609 25. McGill, B. J., Maurer, B. A. & Weiser, M. D. EMPIRICAL EVALUATION OF NEUTRAL THEORY. *Ecology*  
610 **87**, 1411–1423 (2006).
- 611 26. O’Dwyer, J. P. & Cornell, S. J. Cross-scale neutral ecology and the maintenance of biodiversity. *Sci.*  
612 *Rep.* **8**, 10200 (2018).
- 613 27. Dickens, B., Fisher, C. K. & Mehta, P. Analytically tractable model for community ecology with many  
614 species. *Phys. Rev. E* **94**, 022423 (2016).

- 615 28. Bunin, G. Ecological communities with Lotka-Volterra dynamics. *Phys. Rev. E* **95**, 042414 (2017).
- 616 29. Obadia, B. *et al.* Probabilistic Invasion Underlies Natural Gut Microbiome Stability. *Curr. Biol.* **27**,
- 617 1999–2006.e8 (2017).
- 618 30. Vega, N. M. & Gore, J. Stochastic assembly produces heterogeneous communities in the
- 619 *Caenorhabditis elegans* intestine. *PLOS Biol.* **15**, e2000633 (2017).
- 620 31. Hallett, L. M., Shoemaker, L. G., White, C. T. & Suding, K. N. Rainfall variability maintains grass-forb
- 621 species coexistence. *Ecol. Lett.* **22**, 1658–1667 (2019).
- 622 32. Allesina, S. & Levine, J. M. A competitive network theory of species diversity. *Proc. Natl. Acad. Sci.*
- 623 **108**, 5638–5642 (2011).
- 624 33. Niehaus, L. *et al.* Microbial coexistence through chemical-mediated interactions. *Nat. Commun.* **10**,
- 625 2052 (2019).
- 626 34. Pande, S. *et al.* Fitness and stability of obligate cross-feeding interactions that emerge upon gene
- 627 loss in bacteria. *ISME J.* **8**, 953–962 (2014).
- 628 35. Goldford, J. E. *et al.* Emergent simplicity in microbial community assembly. *Science* **7** (2018).
- 629 36. Pacheco, A. R., Moel, M. & Segrè, D. Costless metabolic secretions as drivers of interspecies
- 630 interactions in microbial ecosystems. *Nat. Commun.* **10**, 103 (2019).
- 631 37. Butler, S. & O’Dwyer, J. P. Stability criteria for complex microbial communities. *Nat. Commun.* **9**,
- 632 2970 (2018).
- 633 38. Posfai, A., Taillefumier, T. & Wingreen, N. S. Metabolic Trade-Offs Promote Diversity in a Model
- 634 Ecosystem. *Phys. Rev. Lett.* **118**, 028103 (2017).
- 635 39. Weiner, B. G., Posfai, A. & Wingreen, N. S. Spatial ecology of territorial populations. *Proc. Natl.*
- 636 *Acad. Sci.* **116**, 17874–17879 (2019).
- 637 40. Goyal, A. & Maslov, S. Diversity, Stability, and Reproducibility in Stochastically Assembled Microbial
- 638 Ecosystems. *Phys. Rev. Lett.* **120**, 158102 (2018).

- 639 41. Yurtsev, E. A., Conwill, A. & Gore, J. Oscillatory dynamics in a bacterial cross-protection mutualism.  
640 *Proc. Natl. Acad. Sci.* **113**, 6236–6241 (2016).
- 641 42. Mougi, A. & Kondoh, M. Diversity of Interaction Types and Ecological Community Stability. *Science*  
642 **337**, 349–351 (2012).
- 643 43. Levine, J. M., Bascompte, J., Adler, P. B. & Allesina, S. Beyond pairwise mechanisms of species  
644 coexistence in complex communities. *Nature* **546**, 56–64 (2017).
- 645 44. Mickalide, H. & Kuehn, S. Higher-Order Interaction between Species Inhibits Bacterial Invasion of a  
646 Phototroph-Predator Microbial Community. *Cell Syst.* **9**, 521-533.e10 (2019).
- 647 45. Friedman, J., Higgins, L. M. & Gore, J. Community structure follows simple assembly rules in  
648 microbial microcosms. *Nat. Ecol. Evol.* **1**, 0109 (2017).
- 649 46. Kelsic, E. D., Zhao, J., Vetsigian, K. & Kishony, R. Counteraction of antibiotic production and  
650 degradation stabilizes microbial communities. *Nature* **521**, 516–519 (2015).
- 651 47. Vetsigian, K., Jajoo, R. & Kishony, R. Structure and Evolution of Streptomyces Interaction Networks  
652 in Soil and In Silico. *PLoS Biol.* **9**, e1001184 (2011).
- 653 48. Hart, S. P., Turcotte, M. M. & Levine, J. M. Effects of rapid evolution on species coexistence. *Proc.*  
654 *Natl. Acad. Sci.* **116**, 2112–2117 (2019).
- 655 49. Liu, F. *et al.* Interaction variability shapes succession of synthetic microbial ecosystems. *Nat.*  
656 *Commun.* **11**, 309 (2020).
- 657 50. Di Giacomo, R. *et al.* Deployable micro-traps to sequester motile bacteria. *Sci. Rep.* **7**, 45897 (2017).
- 658 51. Großkopf, T. & Soyer, O. S. Synthetic microbial communities. *Curr. Opin. Microbiol.* **18**, 72–77  
659 (2014).
- 660 52. Hynes, W. F. *et al.* Bioprinting microbial communities to examine interspecies interactions in time  
661 and space. *Biomed. Phys. Eng. Express* **4**, 055010 (2018).

- 662 53. Cremer, J. *et al.* Effect of flow and peristaltic mixing on bacterial growth in a gut-like channel. *Proc.*  
663 *Natl. Acad. Sci.* **113**, 11414–11419 (2016).
- 664 54. Yawata, Y., Nguyen, J., Stocker, R. & Rusconi, R. Microfluidic Studies of Biofilm Formation in Dynamic  
665 Environments. *J. Bacteriol.* **198**, 2589–2595 (2016).
- 666 55. Ley, R. E., Peterson, D. A. & Gordon, J. I. Ecological and Evolutionary Forces Shaping Microbial  
667 Diversity in the Human Intestine. *Cell* **124**, 837–848 (2006).
- 668 56. Stein, R. R. *et al.* Ecological Modeling from Time-Series Inference: Insight into Dynamics and Stability  
669 of Intestinal Microbiota. *PLoS Comput. Biol.* **9**, e1003388 (2013).
- 670 57. Tropini, C., Earle, K. A., Huang, K. C. & Sonnenburg, J. L. The Gut Microbiome: Connecting Spatial  
671 Organization to Function. *Cell Host Microbe* **21**, 433–442 (2017).
- 672 58. Wardle, D. A. The influence of biotic interactions on soil biodiversity. *Ecol. Lett.* **9**, 870–886 (2006).
- 673 59. Strayer, D. L., Power, M. E., Fagan, W. F., Pickett, S. T. A. & Belnap, J. A Classification of Ecological  
674 Boundaries. *BioScience* **53**, 723 (2003).
- 675 60. McNally, L. *et al.* Killing by Type VI secretion drives genetic phase separation and correlates with  
676 increased cooperation. *Nat. Commun.* **8**, 14371 (2017).
- 677 61. Xiong, L., Cooper, R. & Tsimring, L. S. Coexistence and Pattern Formation in Bacterial Mixtures with  
678 Contact-Dependent Killing. *Biophys. J.* **114**, 1741–1750 (2018).
- 679 62. Russell, A. B., Peterson, S. B. & Mougous, J. D. Type VI secretion system effectors: Poisons with a  
680 purpose. *Nat. Rev. Microbiol.* **12**, 137–148 (2014).
- 681 63. Drissi, F., Buffet, S., Raoult, D. & Merhej, V. Common occurrence of antibacterial agents in human  
682 intestinal microbiota. *Front. Microbiol.* **6**, 1–8 (2015).
- 683 64. Cordero, O. X. *et al.* Ecological Populations of Bacteria Act as Socially Cohesive Units of Antibiotic  
684 Production and Resistance. *Science* **337**, 1228–1231 (2012).

- 685 65. Czarán, T. L., Hoekstra, R. F. & Pagie, L. Chemical warfare between microbes promotes biodiversity.  
686 *Proc. Natl. Acad. Sci.* **99**, 786–790 (2002).
- 687 66. Boyer, F., Fichant, G., Berthod, J., Vandenbrouck, Y. & Attree, I. Dissecting the bacterial type VI  
688 secretion system by a genome wide in silico analysis: what can be learned from available microbial  
689 genomic resources? *BMC Genomics* **10**, 104 (2009).
- 690 67. Contento, L., Hilhorst, D. & Mimura, M. Ecological invasion in competition–diffusion systems when  
691 the exotic species is either very strong or very weak. *J. Math. Biol.* **77**, 1383–1405 (2018).
- 692 68. Holmes, E. E., Lewis, M. A., Banks, J. E. & Veit, R. R. Partial Differential Equations in Ecology: Spatial  
693 Interactions and Population Dynamics. *Ecology* **75**, 17–29 (1994).
- 694 69. Momeni, B., Xie, L. & Shou, W. Lotka-Volterra pairwise modeling fails to capture diverse pairwise  
695 microbial interactions. *eLife* **6**, e25051 (2017).
- 696 70. Vallespir Lowery, N. & Ursell, T. Structured environments fundamentally alter dynamics and stability  
697 of ecological communities. *Proc. Natl. Acad. Sci.* **116**, 379–388 (2019).
- 698 71. Reichenbach, T., Mobilia, M. & Frey, E. Mobility promotes and jeopardizes biodiversity in rock–  
699 paper–scissors games. *Nature* **448**, 1046–1049 (2007).
- 700 72. Reichenbach, T., Mobilia, M. & Frey, E. Noise and Correlations in a Spatial Population Model with  
701 Cyclic Competition. *Phys. Rev. Lett.* **99**, 238105 (2007).
- 702 73. Feng, S.-S. & Qiang, C.-C. Self-organization of five species in a cyclic competition game. *Phys. Stat.*  
703 *Mech. Its Appl.* **392**, 4675–4682 (2013).
- 704 74. Park, J., Do, Y. & Jang, B. Multistability in the cyclic competition system. *Chaos Interdiscip. J.*  
705 *Nonlinear Sci.* **28**, 113110 (2018).
- 706 75. Jiang, L.-L., Zhou, T., Perc, M. & Wang, B.-H. Effects of competition on pattern formation in the rock-  
707 paper-scissors game. *Phys. Rev. E* **84**, 021912 (2011).



- 708 76. Reichenbach, T., Mobilia, M. & Frey, E. Coexistence versus extinction in the stochastic cyclic Lotka-  
709 Volterra model. *Phys. Rev. E* **74**, 051907 (2006).
- 710 77. Reichenbach, T. & Frey, E. Instability of Spatial Patterns and Its Ambiguous Impact on Species  
711 Diversity. *Phys. Rev. Lett.* **101**, 058102 (2008).
- 712 78. Avelino, P. P. *et al.* How directional mobility affects coexistence in rock-paper-scissors models. *Phys.*  
713 *Rev. E* **97**, 032415 (2018).
- 714 79. Durrett, R. & Levin, S. Spatial Aspects of Interspecific Competition. *Theor. Popul. Biol.* **53**, 30–43  
715 (1998).
- 716 80. Okabe, A., Boots, B. & Sugihara, K. Spatial Tessellations: Concepts and Applications of Voronoi  
717 Diagrams. in *Wiley Series in Probability and Mathematical Statistics* (1992). doi:10.2307/2687299.
- 718 81. Avelino, P. P., Menezes, J., de Oliveira, B. F. & Pereira, T. A. Expanding spatial domains and transient  
719 scaling regimes in populations with local cyclic competition. *Phys. Rev. E* **99**, 052310 (2019).
- 720 82. Gallien, L., Zimmermann, N. E., Levine, J. M. & Adler, P. B. The effects of intransitive competition on  
721 coexistence. *Ecol. Lett.* **20**, 791–800 (2017).
- 722 83. Sinervo, B. & Lively, C. M. The rock-paper-scissors game and the evolution of alternative male  
723 strategies. *Nature* **380**, 240–243 (1996).
- 724 84. Kirkup, B. C. & Riley, M. A. Antibiotic-mediated antagonism leads to a bacterial game of rock-paper-  
725 scissors in vivo. *Nature* **428**, 412–414 (2004).
- 726 85. Higgins, L. M., Friedman, J., Shen, H. & Gore, J. Co-occurring soil bacteria exhibit a robust  
727 competitive hierarchy and lack of non- transitive interactions. *bioRxiv*  
728 <https://doi.org/10.1101/175737> (2017).
- 729 86. Kim, H. J., Boedicker, J. Q., Choi, J. W. & Ismagilov, R. F. Defined spatial structure stabilizes a  
730 synthetic multispecies bacterial community. *Proc. Natl. Acad. Sci.* **105**, 18188–18193 (2008).

- 731 87. Coyte, K. Z., Schluter, J. & Foster, K. R. The ecology of the microbiome: networks, competition and  
732 stability. *Science* **350**, 663–6 (2015).
- 733 88. Oliveira, N. M., Niehus, R. & Foster, K. R. Evolutionary limits to cooperation in microbial  
734 communities. *Proc. Natl. Acad. Sci.* **111**, 17941–17946 (2014).
- 735 89. Huse, D. A. & Henley, C. L. Pinning and Roughening of Domain Walls in Ising Systems Due to Random  
736 Impurities. *Phys. Rev. Lett.* **54**, 2708–2711 (1985).
- 737 90. Cammarota, C. & Biroli, G. Ideal Glass Transitions by Random Pinning. *Proc. Natl. Acad. Sci.* **109**,  
738 8850–8855 (2012).
- 739 91. Arumugam, S., Petrov, E. P. & Schwille, P. Cytoskeletal pinning controls phase separation in  
740 multicomponent lipid membranes. *Biophys. J.* **108**, 1104–1113 (2015).
- 741 92. Gralka, M. & Hallatschek, O. Environmental heterogeneity can tip the population genetics of range  
742 expansions. *eLife* **8**, e44359 (2019).
- 743 93. Fu, X., Cueto-Felgueroso, L. & Juanes, R. Thermodynamic coarsening arrested by viscous fingering in  
744 partially miscible binary mixtures. *Phys. Rev. E* **94**, 1–5 (2016).
- 745 94. Martinez-Garcia, R., Nadell, C. D., Hartmann, R., Drescher, K. & Bonachela, J. A. Cell adhesion and  
746 fluid flow jointly initiate genotype spatial distribution in biofilms. *PLoS Comput. Biol.* **14**, e1006094  
747 (2018).
- 748 95. Siryaporn, A., Kim, M. K., Shen, Y., Stone, H. A. & Gitai, Z. Colonization, competition, and dispersal of  
749 pathogens in fluid flow networks. *Curr. Biol.* **25**, 1201–1207 (2015).
- 750 96. Borer, B., Tecon, R. & Or, D. Spatial organization of bacterial populations in response to oxygen and  
751 carbon counter-gradients in pore networks. *Nat. Commun.* **9**, (2018).
- 752 97. Cornforth, D. M. & Foster, K. R. Competition sensing: the social side of bacterial stress responses.  
753 *Nat. Rev. Microbiol.* **11**, 285–293 (2013).

- 754 98. Mavridou, D. A. I., Gonzalez, D., Kim, W., West, S. A. & Foster, K. R. Bacteria Use Collective Behavior  
755 to Generate Diverse Combat Strategies. *Curr. Biol.* **28**, 1–11 (2018).
- 756 99. Lowery, N. V., McNally, L., Ratcliff, W. C. & Brown, S. P. Division of labor, bet hedging, and the  
757 evolution of mixed biofilm investment strategies. *mBio* **8**, (2017).
- 758 100. Cui, W., Marsland, R. & Mehta, P. *Diverse communities behave like typical random ecosystems*.  
759 <http://biorxiv.org/lookup/doi/10.1101/596551> (2019) doi:10.1101/596551.
- 760
